# Supplementary material for: Profiling low-mRNA content cells in complex human tissues using BD Rhapsody single-cell analysis
Source: PubMed Central journal article supplement (PMC11683236; doi:10.1016/j.xpro.2024.103475), 2024-12-09
Supplement: mmc1.pdf [file mmc1.pdf]

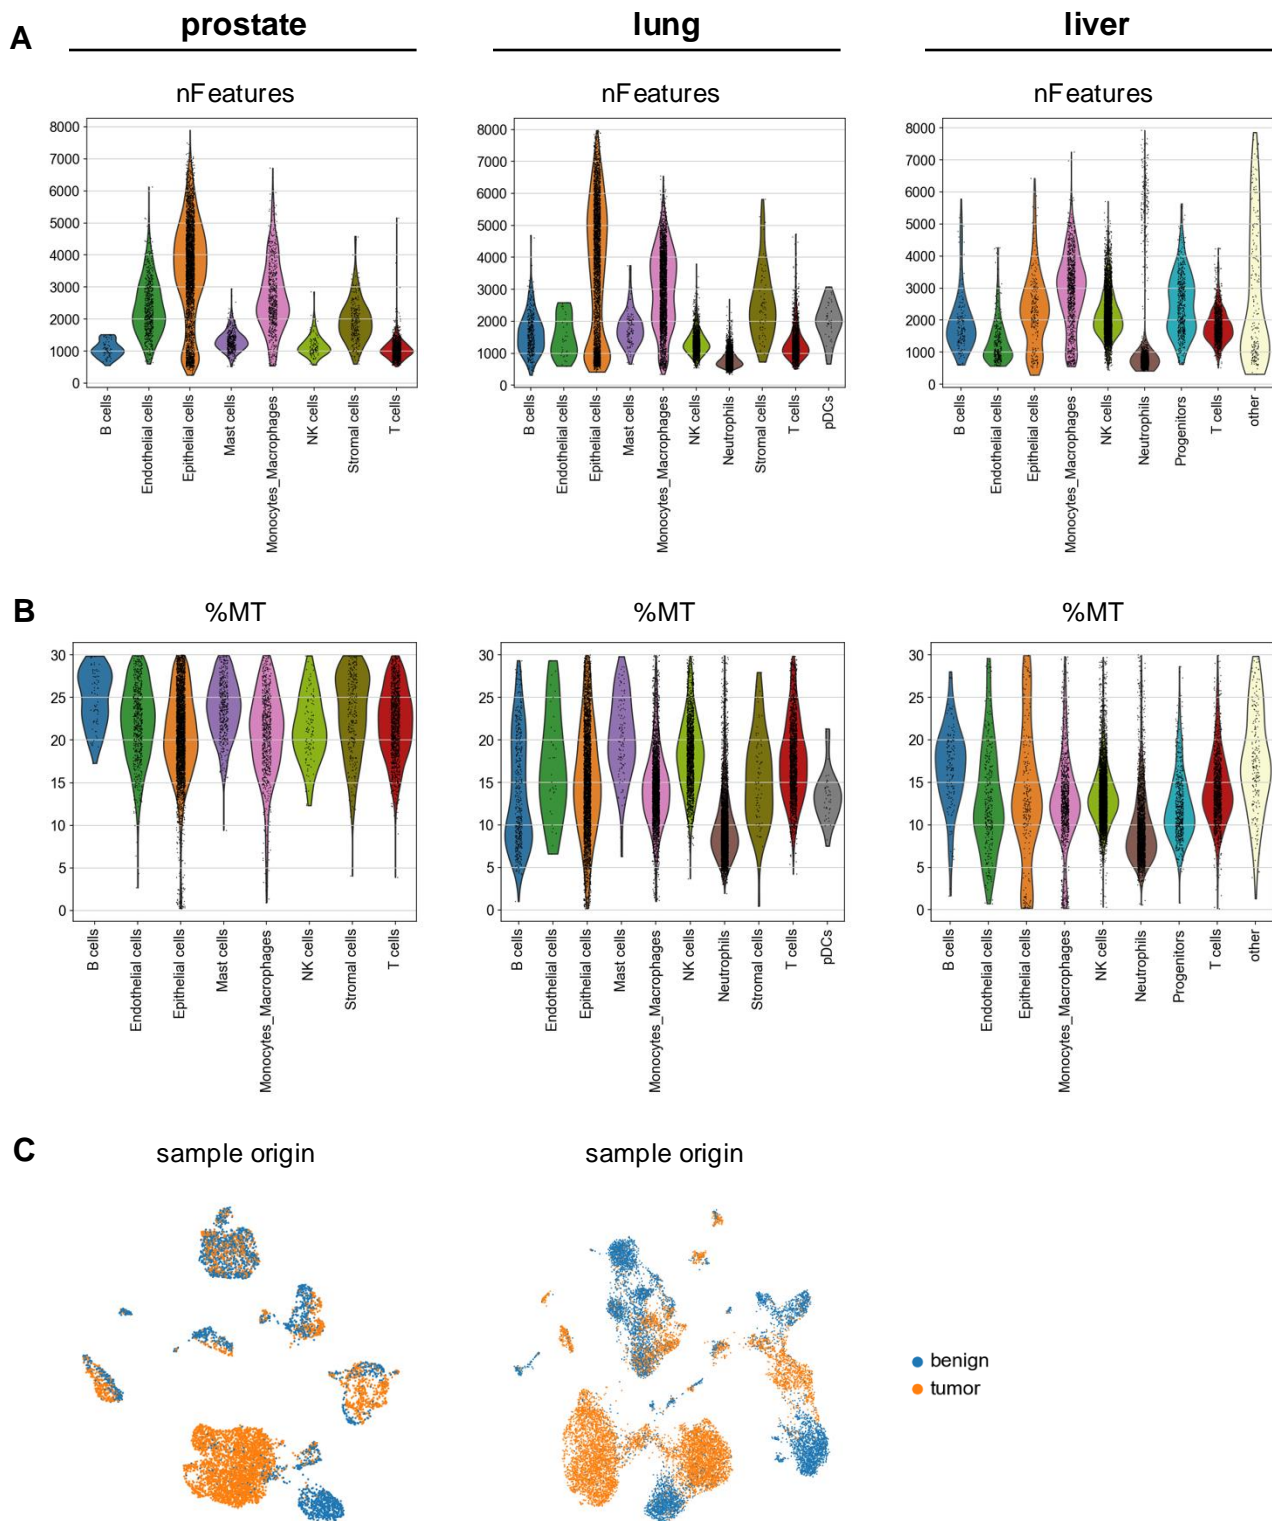

**Figure S1: Related to step 80. Additional QC metrics of prostate (benign/tumor), lung (normal/tumor), and liver (normal) datasets generated with BD Rhapsody.**

(A) nFeatures and (B) percentage of mitochondrial transcripts (%MT) quality metrics of filtered prostate, lung, and liver cells.

(C) UMAP plots of prostate and lung tissue cells, color-coded by origin: normal/benign (blue) and tumor (orange) tissue.

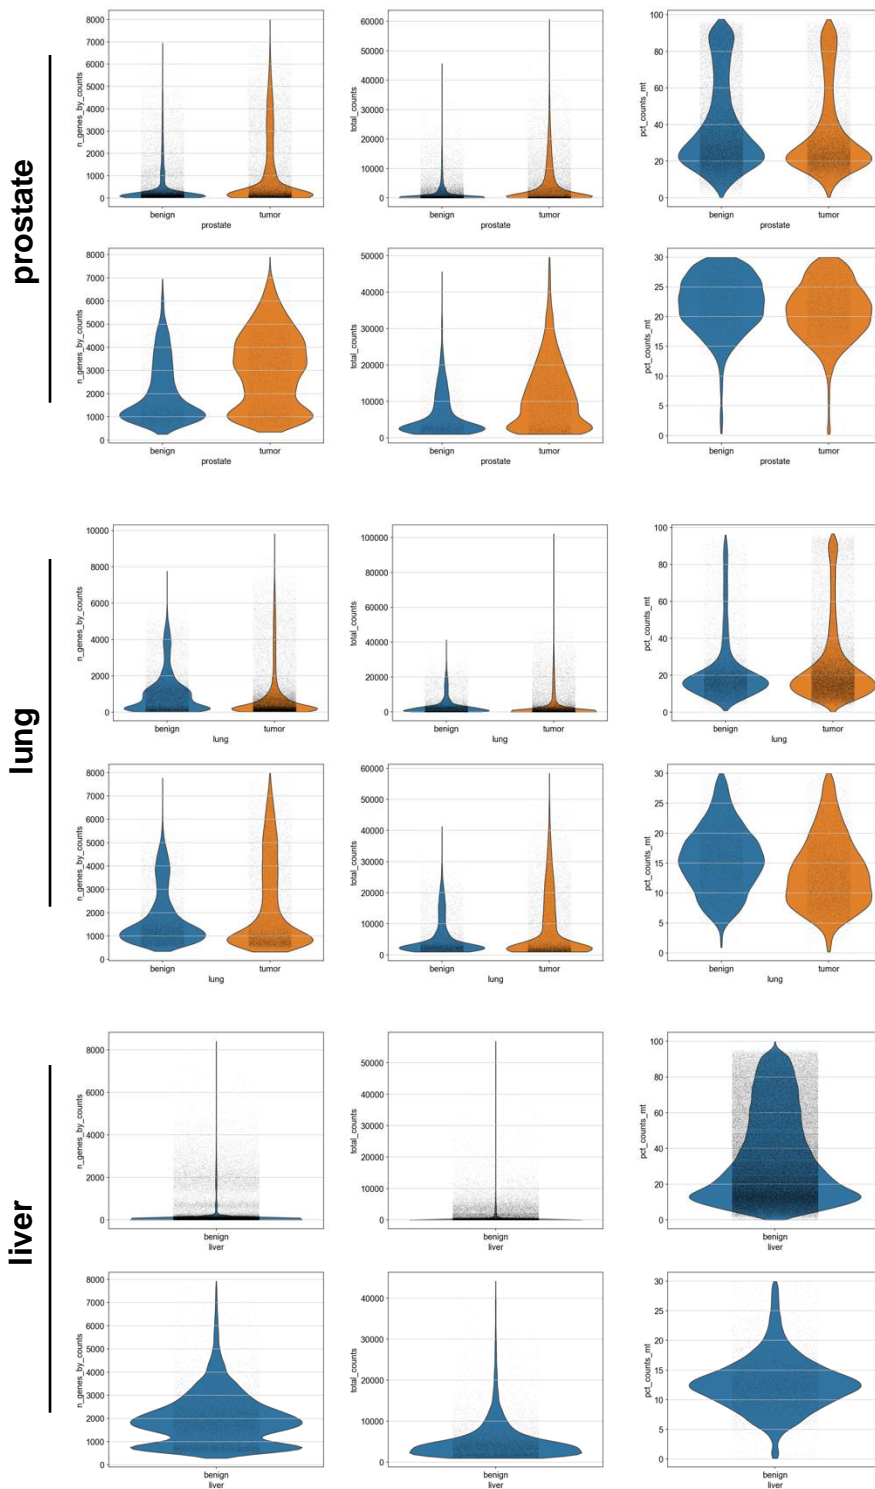

**Figure S2: Related to step 80. Violin plots of prostate (benign/tumor), lung (normal/tumor), and liver (normal) datasets generated with BD Rhapsody before and after filtering.**

The upper plots for each tissue show gene counts, total counts, and percentage of mitochondrial counts before filtering; the lower plots show these metrics after filtering. Normal/benign (blue) and tumor (orange) tissue.
